# Supplementary material for: Global hypomethylation and promoter methylation in small intestinal neuroendocrine tumors: An in vivo and in vitro study
Source: PubMed Central journal article supplement — Epigenetics. 2014 Apr 24;9(7):987–97. doi: 10.4161/epi.28936 (PMC4143414; doi:10.4161/epi.28936), 2014-04-24
Supplement: epi-9-987-s01.pdf [file epi-9-987-s01.pdf]

## **Supplemental Material to:**

**Omid Fotouhi, Maral Adel Fahmideh, Magnus Kjellman,  
Luqman Sulaiman, Anders Höög, Jan Zedenius,  
Jamileh Hashemi, and Catharina Larsson**

**Global hypomethylation and promoter methylation  
in small intestinal neuroendocrine tumors:  
An in vivo and in vitro study**

**Epigenetics 2014; 9(7)**

**<http://dx.doi.org/10.4161/epi.28936>**

**[http://www.landesbioscience.com/journals/epigenetics/  
article/28936/](http://www.landesbioscience.com/journals/epigenetics/article/28936/)**

**Supplementary Table S1. Methylation index (MetI) in SI-NET tumors and cell lines.**

| Tumor<br>sample<br>number   | Gene specific promoter methylation |                          |                         |                         |                         |                      |                        |                       | Global methylation |                 |
|-----------------------------|------------------------------------|--------------------------|-------------------------|-------------------------|-------------------------|----------------------|------------------------|-----------------------|--------------------|-----------------|
|                             | <i>WIF1</i><br>MetI %              | <i>RASSF1A</i><br>MetI % | <i>CTNNB1</i><br>MetI % | <i>CXCL14</i><br>MetI % | <i>NKX2-3</i><br>MetI % | <i>P16</i><br>MetI % | <i>LAMA1</i><br>MetI % | <i>CDH1</i><br>MetI % | ELISA              | LINE1<br>MetI % |
| <b><i>SI-NET tumors</i></b> |                                    |                          |                         |                         |                         |                      |                        |                       |                    |                 |
| 1M                          | 43                                 | <b>20</b>                | <b>19</b>               | 11                      | 5                       | <b>33</b>            | <b>17</b>              | 10                    | 1.8                | <b>63</b>       |
| 2M                          | 16                                 | <b>69</b>                | 4                       | 9                       | 4                       | NA                   | 10                     | <b>22</b>             | 1.4                | <b>71</b>       |
| 3P                          | <b>75</b>                          | 3                        | <b>17</b>               | 12                      | <b>14</b>               | 2                    | 13                     | 8                     | NA                 | <b>54</b>       |
| 4P                          | 36                                 | <b>52</b>                | <b>19</b>               | <b>28</b>               | <b>14</b>               | 2                    | 15                     | 8                     | NA                 | <b>61</b>       |
| 5M                          | <b>61</b>                          | <b>19</b>                | 8                       | 11                      | <b>26</b>               | 2                    | 9                      | 7                     | <b>1.2</b>         | <b>59</b>       |
| 6M                          | <b>72</b>                          | <b>37</b>                | <b>17</b>               | <b>39</b>               | <b>16</b>               | 2                    | 6                      | 9                     | <b>1.0</b>         | <b>55</b>       |
| 7P                          | <b>60</b>                          | <b>12</b>                | 10                      | <b>33</b>               | <b>14</b>               | 2                    | 8                      | 12                    | <b>0.8</b>         | <b>63</b>       |
| 8P                          | 41                                 | 1                        | 13                      | 13                      | <b>10</b>               | 2                    | <b>19</b>              | <b>18</b>             | <b>0.7</b>         | <b>68</b>       |
| 9M                          | <b>72</b>                          | <b>39</b>                | <b>22</b>               | 10                      | <b>16</b>               | <b>12</b>            | 9                      | 3                     | 1.3                | <b>59</b>       |
| 10P                         | <b>92</b>                          | <b>22</b>                | 5                       | 8                       | 5                       | 2                    | 6                      | 4                     | NA                 | <b>62</b>       |
| 11P                         | 48                                 | <b>13</b>                | 8                       | 12                      | 7                       | 1                    | 9                      | 8                     | <b>0.9</b>         | <b>58</b>       |
| 12P                         | <b>53</b>                          | 4                        | 12                      | 8                       | <b>17</b>               | 2                    | 7                      | 6                     | <b>0.8</b>         | <b>56</b>       |
| 13P                         | 33                                 | 7                        | 8                       | <b>16</b>               | 4                       | 3                    | 7                      | 6                     | NA                 | <b>66</b>       |
| 14P                         | 45                                 | <b>38</b>                | <b>25</b>               | 13                      | <b>28</b>               | 2                    | 10                     | 7                     | NA                 | <b>70</b>       |
| 15P                         | <b>68</b>                          | <b>18</b>                | <b>24</b>               | 12                      | 5                       | NA                   | 10                     | 6                     | NA                 | <b>68</b>       |
| 16P                         | 19                                 | <b>13</b>                | 9                       | 7                       | <b>13</b>               | 2                    | 7                      | 5                     | NA                 | <b>68</b>       |
| 17P                         | <b>51</b>                          | 6                        | 8                       | 13                      | <b>11</b>               | 2                    | <b>16</b>              | <b>15</b>             | NA                 | <b>69</b>       |
| 18P                         | <b>63</b>                          | <b>20</b>                | 10                      | 11                      | <b>10</b>               | 2                    | <b>16</b>              | 8                     | NA                 | <b>59</b>       |
| 19P                         | 32                                 | 6                        | 10                      | 7                       | 5                       | 4                    | 12                     | 8                     | NA                 | <b>66</b>       |
| 20P                         | 26                                 | 1                        | <b>18</b>               | 8                       | 2                       | 2                    | 14                     | <b>17</b>             | <b>1.3</b>         | 76              |
| 20M                         | 24                                 | 2                        | 11                      | 10                      | 3                       | 5                    | 12                     | <b>19</b>             | 1.7                | <b>74</b>       |
| 21M1                        | <b>55</b>                          | <b>25</b>                | 5                       | 3                       | 6                       | 3                    | 5                      | 3                     | <b>0.7</b>         | <b>57</b>       |
| 21M2                        | 49                                 | <b>21</b>                | 10                      | 5                       | 9                       | 2                    | 7                      | 7                     | NA                 | <b>54</b>       |
| 22M                         | 36                                 | 2                        | <b>24</b>               | 8                       | 5                       | 2                    | 9                      | 6                     | NA                 | 76              |
| 23P                         | <b>72</b>                          | 9                        | 7                       | 9                       | 7                       | 4                    | 10                     | 7                     | <b>0.6</b>         | <b>66</b>       |
| 23M                         | <b>76</b>                          | 5                        | 7                       | 6                       | 7                       | 3                    | 8                      | 6                     | <b>0.3</b>         | <b>69</b>       |
| 24M1                        | <b>74</b>                          | 3                        | 6                       | <b>33</b>               | <b>14</b>               | 4                    | 11                     | 4                     | NA                 | <b>61</b>       |
| 24M2                        | <b>50</b>                          | 5                        | 6                       | <b>36</b>               | 9                       | 4                    | 10                     | 4                     | NA                 | <b>48</b>       |
| 25                          | <b>65</b>                          | <b>29</b>                | 7                       | <b>18</b>               | 4                       | 9                    | 9                      | 8                     | NA                 | <b>68</b>       |
| 26P                         | 43                                 | <b>3</b>                 | 6                       | 15                      | <b>7</b>                | 2                    | 11                     | 4                     | <b>1.0</b>         | <b>64</b>       |

|     |           |           |           |           |           |           |           |           |            |           |
|-----|-----------|-----------|-----------|-----------|-----------|-----------|-----------|-----------|------------|-----------|
| 26M | <b>55</b> | <b>24</b> | <b>24</b> | 11        | <b>17</b> | 5         | 7         | 7         | <b>0.9</b> | <b>68</b> |
| 27P | 42        | 3         | <b>16</b> | 14        | 6         | 4         | 13        | 14        | <b>1.2</b> | <b>74</b> |
| 27M | 50        | 5         | 10        | 12        | <b>19</b> | 1         | 7         | <b>10</b> | <b>0.7</b> | <b>67</b> |
| 28P | <b>77</b> | <b>15</b> | 10        | 5         | 3         | 4         | 4         | 3         | <b>0.8</b> | <b>63</b> |
| 28M | 42        | <b>7</b>  | <b>19</b> | 9         | 7         | 3         | 9         | 3         | <b>0.9</b> | <b>69</b> |
| 29P | <b>52</b> | 2         | 8         | 9         | 5         | 1         | 7         | 7         | NA         | <b>63</b> |
| 29M | 34        | 1         | <b>16</b> | 10        | 5         | 2         | 15        | <b>3</b>  | NA         | <b>70</b> |
| 30P | <b>61</b> | 3         | 4         | <b>21</b> | <b>11</b> | 3         | 4         | 5         | <b>0.7</b> | <b>64</b> |
| 30M | <b>54</b> | 8         | 10        | 15        | <b>17</b> | 2         | 7         | 7         | 1.4        | <b>67</b> |
| 31P | 32        | <b>47</b> | <b>34</b> | 12        | 3         | <b>24</b> | 5         | 5         | 1.7        | <b>59</b> |
| 31M | 36        | <b>13</b> | <b>20</b> | 5         | 4         | 1         | 5         | 4         | 1.4        | <b>62</b> |
| 32P | 34        | 9         | 11        | <b>21</b> | 3         | 7         | <b>23</b> | 8         | 1.8        | <b>67</b> |
| 32M | 33        | 6         | 9         | <b>19</b> | 3         | 1         | <b>24</b> | 4         | 1.8        | <b>64</b> |
| 33M | 41        | <b>58</b> | 10        | 15        | <b>28</b> | NA        | 12        | 8         | 1.4        | <b>74</b> |

***SI-NET cell lines***

|       |           |   |           |           |           |           |           |           |    |           |
|-------|-----------|---|-----------|-----------|-----------|-----------|-----------|-----------|----|-----------|
| HC45  | 38        | 2 | 7         | 6         | <b>13</b> | 7         | 5         | <b>51</b> | NA | <b>55</b> |
| CNDT2 | <b>99</b> | 1 | <b>44</b> | <b>97</b> | <b>95</b> | <b>96</b> | <b>86</b> | <b>88</b> | NA | <b>74</b> |

NA = Not Assessed

**Supplementary Table S2. Correlations between methylation index (MetI) for individual gene promoters and global methylation**

| Assay          | value | Gene specific promoter methylation |                |               |               |                  |            |                  |                  | Global methylation |        |
|----------------|-------|------------------------------------|----------------|---------------|---------------|------------------|------------|------------------|------------------|--------------------|--------|
|                |       | <i>WIF1</i>                        | <i>RASSF1A</i> | <i>CTNNB1</i> | <i>CXCL14</i> | <i>NKX2-3</i>    | <i>P16</i> | <i>LAMA1</i>     | <i>CDH1</i>      | LINE1              | ELISA  |
| <i>WIF1</i>    | r     |                                    |                |               |               | <b>0.451</b>     |            | -0.279           | <b>-0.402</b>    | <b>-0.47</b>       | -0.491 |
|                | P     | 1                                  | n.s.           | n.s.          | n.s.          | <b>&lt;0.001</b> | n.s.       | 0.027            | <b>0.001</b>     | <b>&lt;0.001</b>   | 0.003  |
| <i>RASSF1A</i> | r     | n.s.                               | 1              | n.s.          | n.s.          | n.s.             | 0.42       | n.s.             | n.s.             | -0.292             | n.s.   |
|                | P     | n.s.                               |                | n.s.          | n.s.          | n.s.             | 0.002      | n.s.             | n.s.             | 0.026              | n.s.   |
| <i>CTNNB1</i>  | r     | n.s.                               | n.s.           | 1             | n.s.          | n.s.             | n.s.       | n.s.             | n.s.             | n.s.               | n.s.   |
|                | P     | n.s.                               | n.s.           |               | n.s.          | n.s.             | n.s.       | n.s.             | n.s.             | n.s.               | n.s.   |
| <i>CXCL14</i>  | r     | n.s.                               | n.s.           | n.s.          | 1             | n.s.             | n.s.       | <b>0.42</b>      | 0.328            | n.s.               | n.s.   |
|                | P     | n.s.                               | n.s.           | n.s.          |               | n.s.             | n.s.       | <b>0.001</b>     | 0.009            | n.s.               | n.s.   |
| <i>NKX2-3</i>  | r     | <b>0.451</b>                       | n.s.           | n.s.          | n.s.          | 1                | n.s.       | n.s.             | n.s.             | n.s.               | n.s.   |
|                | P     | <b>&lt;0.001</b>                   | n.s.           | n.s.          | n.s.          |                  | n.s.       | n.s.             | n.s.             | n.s.               | n.s.   |
| <i>P16</i>     | r     | n.s.                               | 0.42           | n.s.          | n.s.          | n.s.             | 1          | n.s.             | n.s.             | n.s.               | n.s.   |
|                | P     | n.s.                               | 0.002          | n.s.          | n.s.          | n.s.             |            | n.s.             | n.s.             | n.s.               | n.s.   |
| <i>LAMA1</i>   | r     | -0.279                             | n.s.           | n.s.          | <b>0.42</b>   | n.s.             | n.s.       | 1                | <b>0.582</b>     | <b>0.51</b>        | 0.498  |
|                | P     | 0.027                              | n.s.           | n.s.          | <b>0.001</b>  | n.s.             | n.s.       |                  | <b>&lt;0.001</b> | <b>&lt;0.001</b>   | 0.002  |
| <i>CDH1</i>    | r     | <b>-0.402</b>                      | n.s.           | n.s.          | 0.328         | n.s.             | n.s.       | <b>0.582</b>     | 1                | <b>0.574</b>       | n.s.   |
|                | P     | <b>0.001</b>                       | n.s.           | n.s.          | 0.009         | n.s.             | n.s.       | <b>&lt;0.001</b> |                  | <b>&lt;0.001</b>   | n.s.   |
| LINE1          | r     | <b>-0.47</b>                       | -0.292         | n.s.          | n.s.          | n.s.             | n.s.       | <b>0.51</b>      | <b>0.574</b>     | 1                  | n.s.   |
|                | P     | <b>&lt;0.001</b>                   | 0.026          | n.s.          | n.s.          | n.s.             | n.s.       | <b>&lt;0.001</b> | <b>&lt;0.001</b> |                    | n.s.   |
| ELISA          | r     | -0.491                             | n.s.           | n.s.          | n.s.          | n.s.             | n.s.       | 0.498            | n.s.             | n.s.               | 1      |
|                | P     | 0.003                              | n.s.           | n.s.          | n.s.          | n.s.             | n.s.       | 0.002            | n.s.             | n.s.               |        |

n.s. = not significant ( $P$ -value  $>0.05$ )

Statistically significant correlations ( $P$ -value  $\leq 0.001$ , bold) and suggestive correlations ( $P$ -values  $\leq 0.05$ ) are indicated

**Supplementary Table S3. Clinical data for the 33 patients with SI-NET in the study.**

| Case no. | Sample(s) studied | Age at diagnosis | Gender F / M | Sporadic Familial | Metastatic disease |       |       | Follow-up |        |
|----------|-------------------|------------------|--------------|-------------------|--------------------|-------|-------|-----------|--------|
|          |                   |                  |              |                   | liver              | lymph | other | outcome   | months |
| 1        | Dist met          | 63               | F            | Sporadic          | x                  | x     |       | Dead      | -      |
| 2        | Dist met          | 59               | F            | Sporadic          | x                  | x     |       | Dead      | 222    |
| 3        | Prim              | 74               | M            | Sporadic          | x                  | x     |       | Dead      | -      |
| 4        | Prim              | 57               | F            | Sporadic          | x                  | x     |       | Dead      | -      |
| 5        | Dist met          | 69               | M            | Sporadic          | x                  | x     |       | Dead      | 155    |
| 6        | Dist met          | 73               | F            | Sporadic          | x                  | x     |       | Dead      | 12     |
| 7        | Prim              | 44               | F            | Sporadic          | x                  | x     |       | Dead      | 98     |
| 8        | Prim              | 69               | M            | Sporadic          | x                  | x     |       | Dead      | 15     |
| 9        | Dist met          | 65               | F            | Sporadic          | x                  | x     |       | Alive     | 218    |
| 10       | Prim              | 71               | M            | Sporadic          | x                  | x     | x     | Dead      | 155    |
| 11       | Prim              | 75               | F            | Sporadic          |                    | x     |       | Dead      | 124    |
| 12       | Prim              | 39               | M            | Sporadic          | x                  | x     |       | Alive     | 196    |
| 13       | Prim              | 50               | M            | Sporadic          | x                  | x     |       | Dead      | 44     |
| 14       | Prim              | 46               | F            | Sporadic          | x                  | x     |       | Dead      | 86     |
| 15       | Prim              | 77               | M            | Sporadic          | x                  | x     |       | Dead      | 7      |
| 16       | Prim              | 71               | M            | Sporadic          | x                  |       |       | Alive     | 185    |
| 17       | Prim              | 63               | M            | Sporadic          |                    | x     |       | Alive     | 175    |
| 18       | Prim              | 64               | F            | Sporadic          | x                  | x     |       | Dead      | 124    |
| 19       | Prim              | 80               | M            | Sporadic          | x                  | x     |       | Dead      | 69     |
| 20       | Prim + Reg met    | 52               | M            | Sporadic          | x                  | x     |       | Alive     | 93     |
| 21       | Dist met x 2      | 76               | F            | Sporadic          |                    | x     | x     | Dead      | 64     |
| 22       | Reg met           | 71               | M            | Sporadic          | x                  | x     |       | Dead      | 19     |
| 23       | Prim + Reg met    | 65               | F            | Sporadic          | x                  | x     |       | Alive     | 97     |
| 24       | Reg met x 2       | 78               | F            | Sporadic          | x                  | x     |       | Dead      | 53     |
| 25       | Prim              | 61               | M            | Sporadic          | x                  | x     | x     | Alive     | 88     |
| 26       | Prim + Reg met    | 66               | F            | Sporadic          | x                  | x     |       | Dead      | 35     |
| 27       | Prim + Reg met    | 74               | F            | Sporadic          | x                  | x     | x     | Dead      | 73     |
| 28       | Prim + Reg met    | 78               | F            | Sporadic          | x                  | x     |       | Dead      | 84     |
| 29       | Prim + Reg met    | 51               | M            | Sporadic          |                    | x     |       | Alive     | 57     |
| 30       | Prim + Reg met    | 69               | M            | Sporadic          |                    | x     |       | Alive     | 68     |
| 31       | Prim + Reg met    | 75               | F            | Sporadic          | x                  | x     |       | Alive     | 61     |
| 32       | Prim + Reg met    | 66               | M            | Sporadic          | x                  | x     | x     | Alive     | 57     |
| 33       | Reg met           | 74               | F            | Familial          |                    | x     |       | Alive     | 28     |

Prim = Primary; Reg met = Regional metastasis (including mesenterial, regional lymph node, omentum)

Dist met = Distant metastasis (including liver and ovarian metastasis)

**Supplementary Table S4. Genotypes obtained at  
STR profiling of the HC45 and CNDT2 cell lines.**

| STR marker     | Genotypes |              |
|----------------|-----------|--------------|
|                | HC45      | CNDT2        |
| <i>D8S1179</i> | 13 / 16   | 9 / 13 / 14  |
| <i>D21S11</i>  | 29 / 32.2 | 27 / 31      |
| <i>D7S820</i>  | 8 / 8     | 8 / 10       |
| <i>CSF1PO</i>  | 9 / 11    | 8 / 11       |
| <i>D3S1358</i> | 14 / 17   | 16 / 19      |
| <i>TH01</i>    | 6 / 7     | 6 / 10       |
| <i>D13S317</i> | 10 / 11   | 8 / 11       |
| <i>D16S539</i> | 12 / 12   | 12 / 13      |
| <i>D2S1338</i> | 23 / 25   | 16 / 16      |
| <i>D19S433</i> | 12 / 15   | 14 / 14      |
| <i>vWA</i>     | 15 / 16   | 17 / 18 / 25 |
| <i>TPOX</i>    | 8 / 12    | 10 / 11      |
| <i>D18S51</i>  | 16 / 16   | 11 / 13      |
| <i>AMEL</i>    | X / X     | X / X        |
| <i>D5S818</i>  | 12 / 13   | 11 / 14      |
| <i>FGA</i>     | 21 / 24   | 20 / 22      |

STR = Short tandem repeat

**Supplementary Table S5. Details of assays used for Pyrosequencing and qRT-PCR.**

| Assay                                       |                                        | Purchased | Assay ID or        | No. of |
|---------------------------------------------|----------------------------------------|-----------|--------------------|--------|
| Gene                                        | Gene name                              | from      | catalogue no.      | CpGs   |
| <b><i>Methylation by Pyrosequencing</i></b> |                                        |           |                    |        |
| <i>APC</i>                                  | Adenomatous polyposis coli             | Biomeres  | 00108429-1         | 10     |
| <i>CDH1</i>                                 | Cadherin 1                             | Qiagen    | Hs_CDH1_02_PM      | 5      |
| <i>CDH3</i>                                 | Cadherin 3                             | Qiagen    | Hs_CDH3_04_PM      | 3      |
| <i>CTNNB1</i>                               | Catenin beta 1                         | Qiagen    | Hs_CTNNB1_01_PM    | 4      |
| <i>CXCL14</i>                               | Chemokine C-X-C motif ligand 14        | Qiagen    | Hs_CXCL14_02_PM    | 4      |
| <i>HIC1</i>                                 | Hypermethylated in cancer 1            | Qiagen    | Hs_HIC1_05_PM      | 4      |
| <i>LAMA1</i>                                | Laminin alpha 1                        | Qiagen    | Hs_LAMA1_02_PM     | 7      |
| <i>NKX2-3</i>                               | NK2 homeobox 3                         | Qiagen    | Hs_NKX2-3_01_PM    | 4      |
| <i>P14</i>                                  | Cyclin-dependent kinase inhibitor 2A   | Biomeres  | 00103418-9         | 13     |
| <i>P14</i>                                  | Cyclin-dependent kinase inhibitor 2A   | Biomeres  | 00078588-12        | 7      |
| <i>P14</i>                                  | Cyclin-dependent kinase inhibitor 2A   | Qiagen    | Hs_CDKNA_02_PM*    | 6      |
| <i>RASSF1A</i>                              | Ras association domain family member 1 | Biomeres  | 00103418-3         | 5      |
| <i>RASSF1A</i>                              | Ras association domain family member 1 | Qiagen    | Hs_RASSF1A_03_PM** | 5      |
| <i>SMAD2</i>                                | SMAD family member 2                   | Qiagen    | Hs_SMAD2_02_PM     | 4      |
| <i>SMAD4</i>                                | SMAD family member 4                   | Qiagen    | Hs_SMAD4_01_PM     | 7      |
| <i>WIF1</i>                                 | WNT inhibitor factor 1                 | Qiagen    | Hs_WIF1_01_PM      | 2      |
| LINE1                                       | Long Interspersed Elements 1           | Biomeres  | 970042             | 3      |
| <b><i>Expression by qRT-PCR</i></b>         |                                        |           |                    |        |
| <i>CDH1</i>                                 | Cadherin 1                             | ABI       | Hs01023894_m1      |        |
| <i>CTNNB1</i>                               | Catenin beta 1                         | ABI       | Hs00355049_m1      |        |
| <i>CXCL14</i>                               | Chemokine C-X-C motif ligand 14        | ABI       | Hs01557413_m1      |        |
| <i>LAMA1</i>                                | Laminin alpha 1                        | ABI       | Hs00300550_m1      |        |
| <i>NKX2-3</i>                               | NK2 homeobox 3                         | ABI       | Hs00414553_g1      |        |
| <i>P16</i>                                  | Cyclin-dependent kinase inhibitor 2A   | ABI       | Hs00923894_m1      |        |
| <i>RASSF1A</i>                              | Ras association domain family member 1 | ABI       | Hs00200394_m1      |        |
| <i>WIF1</i>                                 | WNT inhibitor factor 1                 | ABI       | Hs00183662_m1      |        |
| <i>WIF1</i>                                 | WNT inhibitor factor 1                 | ABI       | Hs01548031_m1      |        |
| <i>ACTB</i>                                 | Actin, beta                            | ABI       | Hs99999903_m1      |        |

*P14* and *P16* are from the *CDKN2A* locus; ABI = Applied Biosystems

\*used for cell lines \*\* used for cell lines and pooled blood samples
